# Supplementary material for: Statistical overview of the Sniffin’ sticks olfactory test from the perspectives of anosmia and hyposmia
Source: Springer Nature journal article supplement (doi:10.1038/s41598-025-93380-z), 2025-03-15
Supplement: MOESM1 [file 41598_2025_93380_MOESM1_ESM.pdf]

```
% Supplementary 1 - Matlab code
```

```
% MatLAB implementation and simulation of the Sniffin' Sticks threshold, discrimination,  
identification test on different sample sizes (100,000, 1,000,000, 10,000,000, 100,000,000,  
1,000,000,000).
```

```
clear all;
```

```
%Determining the sample size
```

```
samplesize=1000000000;
```

```
%Initialization of the results, the number in the names means the number of
```

```
%alternatives in the Identification subtest
```

```
%result2=zeros(samplesize,1);
```

```
%result3=zeros(samplesize,1);
```

```
%result4=zeros(samplesize,1);
```

```
%result5=zeros(samplesize,1);
```

```
%result6=zeros(samplesize,1);
```

```
%result7=zeros(samplesize,1);
```

```
%result8=zeros(samplesize,1);
```

```
%result9=zeros(samplesize,1);
```

```
result10=zeros(samplesize,1);
```

```
%For cicle for the number of alternatives in the Identification subtest
```

```
%Because of the potential large size of the results, it can be better to run this one by one
```

```
for identi = 10:10
```

```
for indexi = 1:samplesize
```

```
%The parameters of the discrimination subtest
```

```
hitD = 1/3; %The possibility that we hit the right answer in the Discrimination subtest
```

```
Dpoint = 0; %The number of scored points in the Discrimination subtest
```

```
experimentnumberD = 16; %How many experiments we run in the Discrimination subtest
```

```

%The parameters of the Identification subtest

hitI = 1/identi;    %The possibility that we hit the right answer in the Identification subtest

Ipoint = 0;        %The number of scored points in the Identification subtest

experimentnumberI = 16; %How many experiments we run in the Identification subtest

%%

%Simulation of the Threshold subtest

hit = 1/3;        %The possibility that we hit the right answer

level = 16;       %The level of concentration (the higher the level, the smaller the concentration)

round = 1;        %In which round we are

roundpoint = 0;    %What is the score of the round

points = zeros(1,7); %The scores of all rounds (initialization)


%First round

if round == 1

    %While there was no roundpoint, and we have not reached level 0

    while roundpoint == 0 && level > 0

        if rand() <= hit

            %If we hit it twice in a row, there is a roundpoint

            if rand() <= hit

                roundpoint = level;

            else %If not, the the concentration parameter is lowered by 2 levels

                level = level-2;

            end;

        else

            level = level-2;

        end;

    end;

end;

```

```
end;
```

```
%We save the score, if it would be 0 points, then it will be 1, and we modify the level of concentration
```

```
if level == 0
```

```
    points(round) = 1;
```

```
    roundpoint = 1;
```

```
else
```

```
    points(round) = roundpoint;
```

```
end;
```

```
end;
```

```
%2nd round
```

```
round = 2;
```

```
%We are running 7 rounds
```

```
while round <= 7
```

```
%In the even rounds we examine higher levels of concentration parameters
```

```
if mod(round,2) == 0
```

```
    if level < 16
```

```
        level = level + 1;
```

```
    end;
```

```
%While the roundpoint is the same as in the previous round, and we have
```

```
%not reached level 16 yet
```

```
while roundpoint == points(round-1) && level <16
```

```
    if rand() <= hit
```

```

%If we hit it twice in a row, then we increase the level of the concentration
%parameter
if rand() <= hit
    level = level + 1;
else %If not, then there is a roundpoint
    %We handle the case, when the subject did not hit the right
    %answer even for the lowest level of the concentration parameter
    if level>1
        roundpoint = level;
    else
        roundpoint = 0;
    end;
end;
else %We handle the case, when the subject did not hit the right
    %answer even for the lowest level of the concentration parameter
    if level>1
        roundpoint = level;
    else
        roundpoint = 0;
    end;
end;

end;

%We handle the case, when the subject hit the right
%answer even for the highest level of the concentration parameter
if level == 16
    roundpoint = 16;
end;

```

```
%We handle the case, when the subject did not hit the right  
%answers even for the lowest level of the concentration parameter
```

```
if level == 1
```

```
    roundpoint = 1;
```

```
end;
```

```
%We save the score
```

```
    points(round) = roundpoint;
```

```
%Increase the number of rounds by 1
```

```
round = round + 1;
```

```
end;
```

```
%When we are in an odd round
```

```
if mod(round,2) == 1
```

```
    %Decreasing the parameter of the concentration level by 1
```

```
    if level > 1
```

```
        level = level - 1;
```

```
    end;
```

```
%While the roundpoint is the same as in the previous round, and the concentration level is at least 1
```

```
%we decrease the parameter of the concentration level
```

```
while roundpoint == points(round-1) && level >=1
```

```
if rand() <= hit
```

```
    %If we hit the right answer twice, then there is a roundpoint
```

```
    if rand() <= hit
```

```
        roundpoint = level;
```

```
    else %If not, then we further decrease the concentration level
```

```

        level = level-1;
    end;
else
    level = level-1;
end;
end;

%Saving the score, and handling the case of level 0
if level == 0
    points(round) = 1;
    roundpoint = 1;
else
    points(round) = roundpoint;
end;

round = round +1;
end;
end;

Tpoint=(points(4) + points(5) + points(6) + points(7))/4;

%%

%Simulation of the discrimination subtest

for indexj = 1:experimentnumberD
    if rand() <= hitD
        Dpoint = Dpoint+1;
    end;
end;

```

```
%%
```

```
%Simulation of the identification subtest
```

```
for indexj = 1:experimentnumberl
```

```
if rand() <= hitl
```

```
    lpoint = lpoint+1;
```

```
end;
```

```
end;
```

```
%%
```

```
score(indexi) = Tpoint + Dpoint + lpoint;
```

```
end;
```

```
if identi==2
```

```
result2(:,1)=score;
```

```
end;
```

```
if identi==3
```

```
result3(:,1)=score;
```

```
end;
```

```
if identi==4
```

```
result4(:,1)=score;
```

```
end;
```

```
if identi==5
result5(:,1)=score;
end;
```

```
if identi==6
result6(:,1)=score;
end;
```

```
if identi==7
result7(:,1)=score;
end;
```

```
if identi==8
result8(:,1)=score;
end;
```

```
if identi==9
result9(:,1)=score;
end;
```

```
if identi==10
result10(:,1)=score;
end;
```

```
end;
```

```
%Saving the results
```

```
%This line should be modified according to the currently saved case.
```

```
save('TDI_1000_000_000_10.mat','result10','-v7.3')
```

```
%save('TDI_1000_000_000_9.mat','result9','-v7.3')
```



```
%save('TDI_1000_000_000_8.mat','result8','-v7.3')  
%save('TDI_1000_000_000_7.mat','result7','-v7.3')  
%save('TDI_1000_000_000_6.mat','result6','-v7.3')  
%save('TDI_1000_000_000_5.mat','result5','-v7.3')  
%save('TDI_1000_000_000_4.mat','result4','-v7.3')  
%save('TDI_1000_000_000_3.mat','result3','-v7.3')  
%save('TDI_1000_000_000_2.mat','result2','-v7.3')
```
